# Supplementary material
Source: HighWire-hosted journal article supplement (https://bmjopenquality.bmj.com/highwire/filestream/136142/field_highwire_adjunct_files/0/ds6546.docx)
Supplement: ds6546.docx [file ds6546.docx]

| **Name of Medication** | **Number of times prescribed in the first quarter (2012)** | **Number of times prescribed in the fourth quarter after PDSA-4 (2013-2014)** |
| --- | --- | --- |
| CONCERTA | 192 | 21 |
| ADDERALL | 171 | 23 |
| RITALIN | 98 | 8 |
| VYVANSE | 36 | 43 |
| INTUNIV | 27 | 21 |
| FOCALIN | 26 | 14 |
| TRI-VI-SOL | 26 | 23 |
| METADATE | 11 | 6 |

**Table 1: Comparison of number of prescriptions before and after**

**Table 2: Comparison among the overall health team and CHM-Pediatrics**

| Avg. overall Generic Rate | 2010 | 2011 | 2012 | 2013 | 2014 |
| --- | --- | --- | --- | --- | --- |
| MSU Health Team (6 practices including Family Medicine, OB-GYN, Internal Medicine and Pediatrics | 30.75 % | 32% | 33.9% | 37.4% | 39.5% |
| **MSU-CHM Pediatrics alone** | **21.25** | **20.5** | **22.5** | **52.3%** | **65.5%** |
